# Supplementary material for: Two different regimes in alcohol-induced coil–helix transition: effects of 2,2,2-trifluoroethanol on proteins being either independent of or enhanced by solvent structural fluctuations
Source: Royal Society of Chemistry journal article supplement (doi:10.1039/d0cp05103a), 2021-01-01
Supplement: d0cp05103a1.pdf [file d0cp05103a1.pdf]

## Electronic Supplementary Information

### Two Different Regimes in Alcohol-Induced Coil-Helix Transition: Effects of 2,2,2-Trifluoroethanol on Proteins Being Either Independent of or Enhanced by Solvent Structural Fluctuations

Hiroyo Ohgi,<sup>#,†</sup> Hiroshi Imamura,<sup>#,‡</sup> Tomonari Sumi,<sup>\*,§</sup> Keiko Nishikawa,<sup>†,⊥</sup> Yoshikata Koga,<sup>||</sup> Peter Westh,<sup>∇</sup> and Takeshi Morita<sup>\*,†</sup>

<sup>†</sup>Department of Chemistry, Graduate School of Science, Chiba University, Chiba 263-8522, Japan,

<sup>‡</sup>Department of Applied Chemistry, College of Life Sciences, Ritsumeikan University, Shiga 525-8577, Japan,

<sup>§</sup>Research Institute for Interdisciplinary Science, Okayama University, Okayama 700-8530, Japan,

<sup>⊥</sup>Toyota Physical & Chemical Research Institute, Nagakute, Aichi 480-1192, Japan,

<sup>||</sup>Department of Chemistry, The University of British Columbia, Vancouver, Canada V6T 1Z1,

<sup>∇</sup>Department of Biotechnology and Biomedicine, Technical University of Denmark, Søtofts Plads, 2800, Kgs. Lyngby, Denmark.

<sup>#</sup>HO and HI contributed equally.

\*Corresponding authors

E-mail: sumi@okayama-u.ac.jp (T. Sumi)

moritat@faculty.chiba-u.jp (T. Morita)

Table S1. The values of  $a_{33}$ ,  $\Delta G_{23}$ , and unit conversion between mole fraction of TFE,  $x_{\text{TFE}}$ , and the molarity,  $M_{\text{TFE}}$ , shown in Figure 8. The helix contents at these TFE concentrations are calculated by Eqs. (19) and (20) with the reported values ( $\Delta G_0 = 9.5 \text{ kJ mol}^{-1}$ ,  $m = 6 \text{ kJ mol}^{-1} \text{ M}^{-1}$ ) for melittin. [1]

| $M_{\text{TFE}} \text{ mol L}^{-1}$ | $x_{\text{TFE}}$ | $a_{33}$ | $\Delta G_{23}$ | $f_h$  |
|-------------------------------------|------------------|----------|-----------------|--------|
| 0.0315                              | 0.000570         | 0.997    | 0.0644          | 0.0215 |
| 0.0525                              | 0.000951         | 0.533    | 0.201           | 0.0226 |
| 0.106                               | 0.00192          | 1.04     | 0.207           | 0.0256 |
| 0.279                               | 0.00512          | 1.14     | 0.497           | 0.0388 |
| 0.545                               | 0.0101           | 1.51     | 0.737           | 0.0719 |
| 0.793                               | 0.0149           | 1.05     | 1.55            | 0.125  |

Table S1 (continued)

| $M_{\text{TFE}} \text{ mol L}^{-1}$ | $x_{\text{TFE}}$ | $a_{33}$ | $\Delta\Gamma_{23}$ | $f_h$ |
|-------------------------------------|------------------|----------|---------------------|-------|
| 1.03                                | 0.0195           | 1.02     | 2.06                | 0.203 |
| 1.39                                | 0.0268           | 1.07     | 2.64                | 0.381 |
| 1.55                                | 0.0302           | 0.827    | 3.81                | 0.478 |
| 1.67                                | 0.0327           | 1.02     | 3.33                | 0.551 |
| 1.95                                | 0.0388           | 0.917    | 4.33                | 0.711 |
| 2.23                                | 0.0451           | 0.783    | 5.81                | 0.831 |
| 2.51                                | 0.0516           | 0.668    | 7.67                | 0.908 |
| 2.79                                | 0.0582           | 0.496    | 11.5                | 0.951 |
| 2.93                                | 0.0615           | 0.460    | 13.0                | 0.965 |
| 2.93                                | 0.0617           | 0.450    | 13.3                | 0.965 |
| 3.08                                | 0.0654           | 0.402    | 15.6                | 0.976 |
| 3.20                                | 0.0683           | 0.386    | 16.9                | 0.982 |
| 3.21                                | 0.0688           | 0.396    | 16.6                | 0.982 |
| 3.36                                | 0.0725           | 0.343    | 19.9                | 0.987 |
| 3.50                                | 0.0763           | 0.313    | 22.8                | 0.991 |
| 3.52                                | 0.0768           | 0.306    | 23.5                | 0.992 |
| 3.65                                | 0.0803           | 0.298    | 24.9                | 0.994 |
| 3.79                                | 0.0841           | 0.256    | 30.2                | 0.996 |
| 3.79                                | 0.0841           | 0.253    | 30.5                | 0.996 |
| 3.94                                | 0.0882           | 0.234    | 34.3                | 0.997 |
| 4.07                                | 0.0920           | 0.235    | 35.3                | 0.998 |
| 4.09                                | 0.0925           | 0.219    | 38.0                | 0.998 |
| 4.22                                | 0.0962           | 0.213    | 40.3                | 0.998 |
| 4.34                                | 0.0999           | 0.198    | 44.8                | 0.999 |
| 4.34                                | 0.0999           | 0.188    | 47.1                | 0.999 |
| 4.65                                | 0.109            | 0.175    | 54.1                | 0.999 |
| 4.91                                | 0.118            | 0.169    | 59.3                | 1.00  |
| 5.20                                | 0.127            | 0.160    | 66.4                | 1.00  |
| 5.50                                | 0.137            | 0.156    | 71.8                | 1.00  |
| 5.64                                | 0.142            | 0.169    | 67.9                | 1.00  |
| 5.90                                | 0.152            | 0.163    | 73.6                | 1.00  |
| 6.19                                | 0.163            | 0.168    | 75.2                | 1.00  |
| 6.46                                | 0.174            | 0.175    | 75.2                | 1.00  |
| 6.74                                | 0.186            | 0.181    | 75.9                | 1.00  |
| 7.07                                | 0.200            | 0.189    | 76.3                | 1.00  |
| 8.44                                | 0.271            | 0.271    | 63.4                | 1.00  |
| 9.87                                | 0.370            | 0.515    | 39.1                | 1.00  |

## Thermodynamic Equilibrium of Coil-Helix Transition

We note that Eq.(19) in the manuscript neglects a non-ideality of the protein solution as follows. Reaction Gibbs function,  $\Delta G_r$ , for the equilibrium coil  $\rightleftharpoons$  helix of a protein is defined as

$$\Delta G_r = \mu_h - \mu_c, \quad (\text{S1})$$

where  $\mu_h$  and  $\mu_c$  are the chemical potentials of the helix and the coil, respectively. A virial expansion for expressing non-ideality of the protein solution gives their chemical potentials as [2]

$$\mu_h = \bar{\mu}_h + RT\ln(c_h) + 2RTMB_h c_h \quad (\text{S2})$$

and

$$\mu_c = \bar{\mu}_c + RT\ln(c_c) + 2RTMB_c c_c, \quad (\text{S3})$$

where  $\bar{\mu}_h$  and  $\bar{\mu}_c$  are the standard chemical potentials of the helix and the coil, respectively.  $c_h$  and  $c_c$  are the concentrations of the helix and the coil, respectively.  $B_h$  and  $B_c$  are the second virial coefficients of the helix and the coil, respectively; we assumed zero values for the higher-order terms of the coefficients such as the third virial coefficient. The second virial coefficient represents an effective intermolecular interaction of the protein; solvent effects are included.  $R$  is the gas constant.  $T$  is the thermodynamic temperature. The total concentration of the protein,  $c$ , is

$$c = c_h + c_c. \quad (\text{S4})$$

$c_h$  and  $c_c$  are rewritten with use of  $f_h$ , a population of the helix or a fraction of the helix, as

$$c_h = f_h c \quad (\text{S5})$$

$$c_c = (1 - f_h)c. \quad (\text{S6})$$

With  $\ln(c_h/c_c) = \ln(f_h/(1 - f_h))$ ,  $\Delta G_r$  is given as

$$\begin{aligned} \Delta G_r &= \mu_h - \mu_c \\ &= \bar{\mu}_h + RT\ln(c_h) + 2RTMB_h c_h - (\bar{\mu}_c + RT\ln(c_c) + 2RTMB_c c_c) \\ &= (\bar{\mu}_h - \bar{\mu}_c) + RT\ln(c_h/c_c) + RTMc(f_h B_h - (1 - f_h)B_c) \\ &= (\bar{\mu}_h - \bar{\mu}_c) + RT\ln(f_h/(1 - f_h)) + RTMc(f_h B_h - (1 - f_h)B_c). \end{aligned} \quad (\text{S7})$$

$\Delta G_r$  at the equilibrium coil  $\rightleftharpoons$  helix is zero, and we define  $\Delta G(c)$  as follows.

$$\Delta G(c) = -RT\ln(f_h/(1 - f_h)) - RTMc(f_h B_h - (1 - f_h)B_c) \quad (\text{S8})$$

$$\Delta G(c) = \bar{\mu}_h - \bar{\mu}_c \quad (\text{S9})$$

$\Delta G(c)$  is a function of  $c$ . When the protein solution is ideal (no intermolecular interaction; i.e.,  $B_h = 0$  and  $B_c = 0$ ),  $\mu_h$  and  $\mu_c$  are represented as

$$\mu_h = \bar{\mu}_h + RT \ln(c_h) \quad (\text{S10})$$

$$\mu_c = \bar{\mu}_c + RT \ln(c_c). \quad (\text{S11})$$

And,  $\Delta G_r = 0$  gives  $\Delta G(c)$  as  $\Delta G_{\text{ideal}}$ :

$$\Delta G_{\text{ideal}} = \bar{\mu}_h - \bar{\mu}_c = -RT \ln(f_h/(1 - f_h)), \quad (\text{S12})$$

where the subscript ‘‘ideal’’ indicates an ideal solution. Eq.(S12) indicates no protein-concentration dependence of  $\Delta G_{\text{ideal}}$ . Eq.(S8) and Eq.(S9) are generalized formulas of the thermodynamic equilibrium of coil  $\rightleftharpoons$  helix, where the non-ideality is included. We write the non-ideal term in Eq.(S8) as  $\Delta G_{\text{non-ideal}}$ :

$$\Delta G(c) = \Delta G_{\text{ideal}} + \Delta G_{\text{non-ideal}} \quad (\text{S13})$$

$$\Delta G_{\text{non-ideal}} = -RTM c(f_h B_h - (1 - f_h) B_c). \quad (\text{S14})$$

These parameters require measurement of  $f_h$  at infinite dilution, while experiments by conventional spectroscopies such as circular dichroism are conducted at a finite concentration. Thus, concentration dependence should be involved in the experimentally determined population of the helix or a fraction of the helix. Here, we designate this as  $f_h(c)$  and find

$$\lim_{c \rightarrow 0} f_h(c) = f_h. \quad (\text{S15})$$

The data experimentally available have been ‘‘**empirically**’’ treated as

$$-RT \ln(f_h(c)/(1 - f_h(c))) = A + mC_a, \quad (\text{S16})$$

where  $A$  and  $m$  values are constant, and  $C_a$  is the concentration of an additive such as alcohol in unit of molar. And, Eq.(S16) has also been deemed to be  $\Delta G(c)$ :

$$\Delta G(c) = A + mC_a \quad (\text{S17})$$

Accordingly, Eqs.(S12–17) give

$$\Delta G(c) = -RT \ln(f_h(c)/(1 - f_h(c)))$$

$$= -RT\ln(f_h/(1 - f_h)) + \Delta G_{\text{non-ideal}} \quad (\text{S18})$$

$$RT\ln(f_h/(1 - f_h)) - RT\ln(f_h(c)/(1 - f_h(c))) = \Delta G_{\text{non-ideal}}. \quad (\text{S19})$$

$\Delta G_{\text{non-ideal}}$  reflects the difference between  $f_h$  and the experimentally given  $f_h(c)$ . Taken together, we used  $\Delta G(c)$  in Eq.(S8) as  $\Delta G$  in Eq.(19) of the manuscript with the assumption of  $B_h = 0$  and  $B_c = 0$ :

$$\Delta G_{\text{non-ideal}} = 0 \text{ (i.e., } f_h(c) = f_h \text{)} \quad (\text{S20})$$

and

$$\Delta G(c) = \Delta G_{\text{ideal}}. \quad (\text{S21})$$

## References

- [1] N. Hirota, Y. Goto and K. Mizuno, *Protein Sci.*, 1997, **6**, 416–421.
- [2] B. Guo, S. Kao, H. McDonald, A. Asanov, L. L. Combs and W. W. Wilson, Correlation of Second Virial Coefficients and Solubilities Useful in Protein Crystal Growth. *J. Cryst. Growth*, 1999, **196**, 424–433.
